# Supplementary material
Source: PubMed Central journal article supplement (PMC6501690)

**ESM Figure S1.** The reproductive rate of *E. cloacae* in live and dead *B. thuringiensis* infected hosts throughout experimental passage. Note that under the 'dead' selection regime insect larvae die from 5-7 days after egg hatch, while live survivors are harvested 8 days after egg hatch. There was no significant difference in symbiont population sizes between live insects and dead insects in this experiment, meaning symbiont population in the gut of 8 day-old larvae is roughly the same as the symbiont population size that invaded the entire cadaver of the smaller 5-7 day-old larvae.

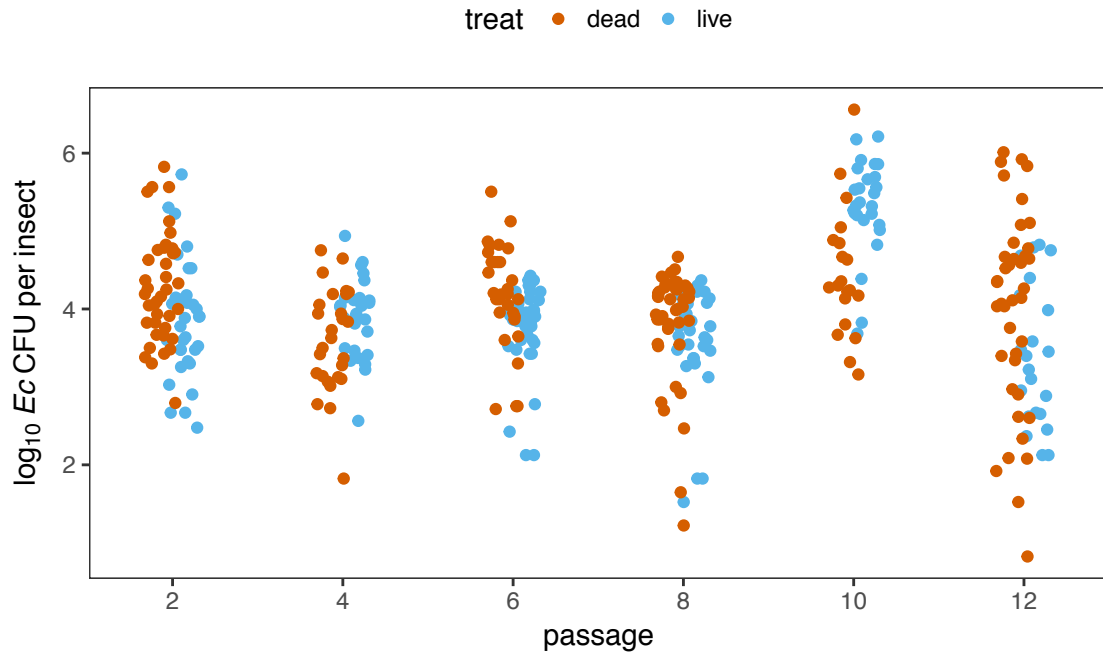

Supplement: rspb20190236supp1.pdf [file rspb20190236supp1.pdf]
