# Supplementary material
Source: PubMed Central journal article supplement (PMC6501690)

**Figure S2.** Population size (cfu per insect) of ancestor and evolved *Ec* in live insects. Data are means and standard errors of two replicated experiments. Asterisks indicate significant differences in population size between evolved lineages and the ancestor in planned *post hoc* tests where \* $P < 0.05$ , \*\* $P < 0.01$ , \*\*\*  $P < 0.0001$ .

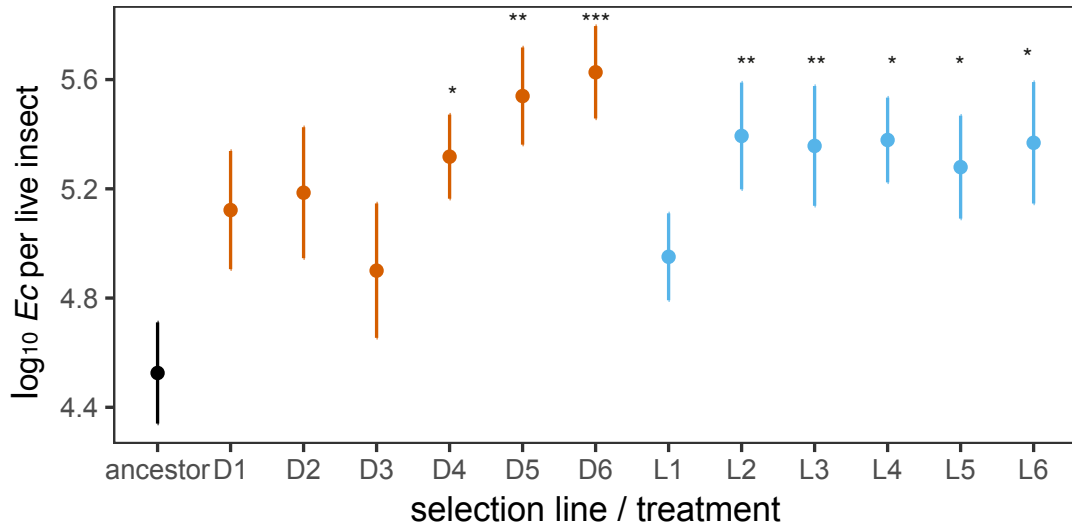

Supplement: rspb20190236supp2.pdf [file rspb20190236supp2.pdf]
