# Supplementary material
Source: PubMed Central journal article supplement (PMC6501690)
Supplement: rspb20190236supp3.pdf [file rspb20190236supp3.pdf]

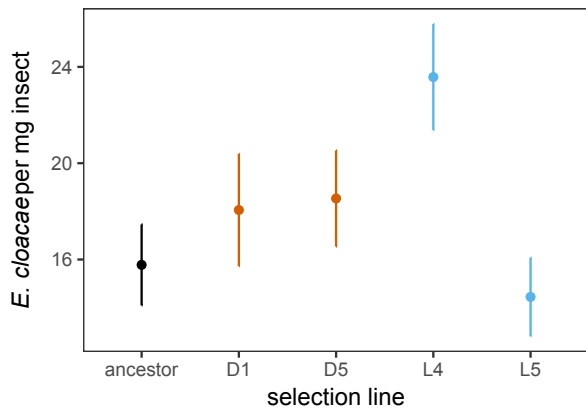

**Figure S3.** Phenotypic variation in early colonization of insect larvae. Lineages in this experiment were selected on the basis of putatively evolved difference in virulence from ancestors (see Fig 4). Data are square root transformed cfu in first 72 hours of infection. There was significant variation between lineages in early colonization ability ( $F_{4,323} = 3.1$   $P = 0.016$ ), largely driven by lineage L4.
