# Supplementary material
Source: PubMed Central journal article supplement (PMC6501690)
Supplement: rspb20190236supp4.pdf [file rspb20190236supp4.pdf]

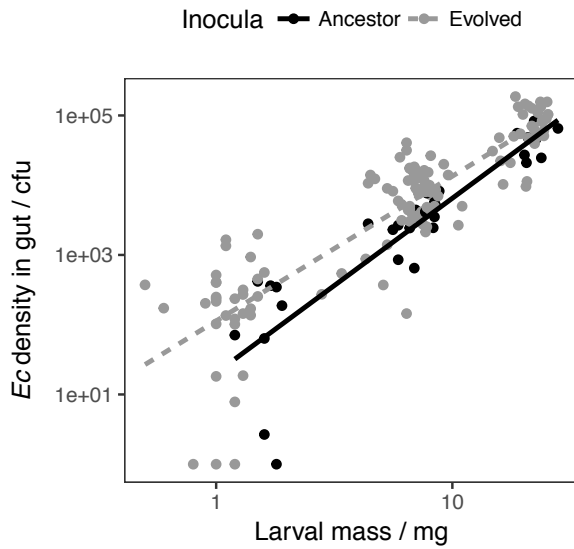

**Figure S4.** Relationship between larval mass and number of *E. cloacae* within hosts. Data are from insects infected with the ancestor clone or four clones from lineages with putatively altered virulence (D5, D1, L4, L5). Bacterial density increases with linearly mass on a log-log scale ( $F_{1,158} = 52.0$ ,  $P < 0.0001$ ), but bacterial counts are also greater in evolved clones per unit mass insect ( $F_{1,157} = 47.9$ ,  $P = 0.0003$ )- see also Figure 2.
